# Supplementary material
Source: PubMed Central journal article supplement (PMC4227733)
Supplement: ja508782y_si_001.pdf [file ja508782y_si_001.pdf]

*Supporting Information for*

**Hybrid Biosynthesis of Roseobacticides from Algal and Bacterial  
Precursor Molecules**

Mohammad R. Seyedsayamdost,<sup>†,\*</sup> Rurun Wang,<sup>†</sup> Roberto Kolter,<sup>‡</sup> and Jon Clardy<sup>§,\*</sup>

<sup>†</sup>Department of Chemistry, Princeton University, Princeton, NJ 08544

<sup>‡</sup>Department of Microbiology & Immunology and Department of Biological Chemistry & Molecular  
Pharmacology, Harvard Medical School, Boston, MA 02115

\*email: mrseyed@princeton.edu; jon\_clardy@hms.harvard.edu

**Reagents and general procedures.** Yeast extract and tryptone were purchased from Becton Dickinson. Ring-<sup>2</sup>H<sub>4</sub>-L-tyrosine, ring-<sup>2</sup>H<sub>5</sub>-L-phenylalanine, ring-<sup>2</sup>H<sub>5</sub>-L-tryptophan, 2-<sup>13</sup>C-malonic acid, and ring-<sup>2</sup>H<sub>4</sub>-4-hydroxybenzaldehyde were purchased from Cambridge Isotopes Laboratories. All other reagents, including sea salt, *p*-coumaric acid, sinapic acid, phenylacetic acid, 1,2-<sup>13</sup>C-phenylacetic acid, ring-<sup>2</sup>H<sub>5</sub>-phenylacetic acid, 3-fluoro-DL-tyrosine, ring-<sup>2</sup>H<sub>5</sub>-phenylglycine, ring-<sup>2</sup>H<sub>5</sub>-indoleacetic acid, unlabeled L-phenylalanine, NAD, and phenylalanine dehydrogenase, the latter three required for the enzymatic synthesis of isotopically labeled phenylpyruvic acid, were obtained from Sigma-Aldrich. <sup>34</sup>S-L-Cysteine was a kind gift of Prof. Jeroen Dickschat.<sup>1</sup> UV-visible absorbance spectra were collected on an Agilent Cary 60 Spectrophotometer. HPLC purifications were carried out on an Agilent 1200 Series analytical HPLC system equipped with a photo diode array detector and an automated fraction collector, or on an Agilent 1200 Series preparative HPLC system also equipped with the same modules. Low resolution HPLC-MS analysis was performed on an Agilent 1200 Series HPLC system equipped with a diode array detector and a 6130 Series ESI mass spectrometer using an analytical Phenomenex Luna C18 column (5 μm, 4.6 × 100 mm) operating at 0.7 mL/min with a gradient of 10 % MeCN in H<sub>2</sub>O (+0.1% formic acid) to 100% MeCN (+0.1% formic acid) over 25 min. High resolution HPLC-ESI-MS (HR-MS) and tandem MS (MS/MS) were out on a 6540 UHD Accurate Mass Q-tof LC-MS system (Agilent), which consists of a 1260 Infinity Series HPLC system, an automated liquid sampler, a diode array detector, a JetStream ESI source, and the 6540 Series Q-tof. The HR-HPLC-MS was calibrated to within 1 ppm. Samples were resolved on a Poroshell 120 EC-C18 column (Agilent, 2.7 μm, 3 x 50 mm) operating at 0.4 mL/min with a gradient of 10% MeCN in H<sub>2</sub>O to 95% MeCN in H<sub>2</sub>O over 13 min. Both MeCN and H<sub>2</sub>O contained 0.1% (v/v) formic acid. <sup>1</sup>H and 2D NMR spectra were recorded in the inverse-detection probe of a Varian Inova spectrometer (600 MHz for <sup>1</sup>H, 150 MHz for <sup>13</sup>C) at the Harvard Medical School NMR Facility. <sup>13</sup>C NMR spectra were recorded on the same instrument with a broad-band probe. NMR spectra of fluoro-roseobactide A were recorded at the Princeton Chemistry NMR Facility on a Bruker Avance III 800 MHz spectrometer equipped with a cryoprobe for <sup>1</sup>H and <sup>19</sup>F measurements, and a Bruker Avance III 500 MHz instrument equipped with a <sup>1</sup>H-optimized cryoprobe for gCOSY experiments. Spectra were routinely obtained in MeOH-*d*<sub>4</sub>, unless otherwise indicated, and the chemical shifts were referenced to the residual solvent peak(s).

**Synthesis of isotopically-labeled precursors.** Isotopically-labeled *p*-coumaric acid,<sup>2</sup> phenylpyruvic acid,<sup>3</sup> and phenylglyoxylic acid<sup>4</sup> were synthesized as previously described with minor modifications.

*2-<sup>13</sup>C-p-coumaric acid and ring-<sup>2</sup>H<sub>4</sub>-p-coumaric acid.* To a 50 mL pear-shaped flask fitted with a stir bar were added 4.5 mL of acetic acid, 9 mmol of 4-hydroxybenzaldehyde (1.1 g), and 9 mmol of morpholine (0.8 g). The mixture was stirred for 10 minutes before supplementing with 9 mmol of malonic acid (0.93 g). The reaction was refluxed for 1.5 h at 105°C, then cooled by stirring in ice-cold water for 15 min. To precipitate the product, the mixture was poured into 12 mL of ice-cold water, incubated on ice for 30 min, and then filtered. The residue was washed twice with a small amount of water and dried on the filter providing pure *p*-coumaric acid with a yield of 54%. <sup>2-<sup>13</sup>C-malonic acid or ring-<sup>2</sup>H<sub>4</sub>-hydroxybenzaldehyde</sup> was used to generate the desired isotopically-labeled *p*-coumaric acids, which were characterized by HPLC-MS using authentic standards, NMR, and HR-MS, as described above. Authentic pCA: HPLC-MS R<sub>t</sub> = 8.0 min, λ<sub>max</sub> = 310 nm, LR-ESI-MS [M+H]<sup>+</sup><sub>expt</sub> = 165.1, [M+H]<sup>+</sup><sub>calc</sub> = 165.1. <sup>2-<sup>13</sup>C-pCA</sup>: HPLC-MS R<sub>t</sub> = 8.0 min, λ<sub>max</sub> = 310 nm, LR-ESI-MS [M+H]<sup>+</sup><sub>expt</sub> = 166.1, [M+H]<sup>+</sup><sub>calc</sub> = 166.1; HR-MS [M+H]<sup>+</sup><sub>expt</sub> = 166.0577, [M+H]<sup>+</sup><sub>calc</sub> = 166.0585. Ring-<sup>2</sup>H<sub>4</sub>-pCA: HPLC-MS R<sub>t</sub> = 7.9 min, λ<sub>max</sub> = 310 nm, LR-ESI-MS [M+H]<sup>+</sup><sub>expt</sub> = 169.1; [M+H]<sup>+</sup><sub>calc</sub> = 169.1, HR-MS [M+H]<sup>+</sup><sub>expt</sub> = 169.0795, [M+H]<sup>+</sup><sub>calc</sub> = 169.0803; <sup>1</sup>H NMR (600 MHz, acetone-*d*<sub>6</sub>) δ = 6.37 (d, 1H, C2-<sup>1</sup>H, 15.9 Hz), δ = 7.65 (d, 1H, C3-<sup>1</sup>H, 15.9 Hz).

*Ring-<sup>2</sup>H<sub>5</sub>-phenylpyruvic acid.* To a 50 mL polypropylene Falcon tube equipped with a stir bar were added 10 mL of glycine buffer (0.1 M glycine, pH 10.8), 165 μmol of ring-<sup>2</sup>H<sub>5</sub>-L-phenylalanine, 95 μmol of cofactor NAD and 12 U of phenylalanine dehydrogenase (~2 mg). The reaction was stirred overnight at room temperature and reaction progress monitored by TLC using a solvent system of MeCN/H<sub>2</sub>O (4:1). After overnight incubation, the reaction was loaded onto a silica gel column (d=1.25 cm, l=18 cm), which had been equilibrated in EtOAc/MeOH/formic acid (98:1:1). The mixture was resolved isocratically and fractions containing ring-<sup>2</sup>H<sub>5</sub>-phenyl-pyruvic acid, as judged by HPLC-MS analysis, were pooled and concentrated in vacuo. The product was obtained in a 25% yield and was characterized by HPLC-MS using an authentic standard (phenylpyruvic acid) and by HR-MS. Authentic phenylpyruvic acid: HPLC-MS R<sub>t</sub> = 11.9 min, λ<sub>max</sub> = 289 nm, LR-ESI-MS [M-H]<sup>-</sup><sub>expt</sub> = 163.0, [M-H]<sup>-</sup><sub>calc</sub> = 163.0. Ring-<sup>2</sup>H<sub>5</sub>-phenylpyruvic acid: HPLC-MS R<sub>t</sub> = 11.9 min, λ<sub>max</sub> = 290 nm, LR-

ESI-MS  $[M-H]^-_{\text{expt}} = 168.0$ ,  $[M-H]^-_{\text{calc}} = 168.0$ ; HR-MS  $[M-H]^-_{\text{expt}} = 168.0726$ ,  $[M-H]^-_{\text{calc}} = 168.0709$ .

*1,2-<sup>13</sup>C<sub>2</sub>-phenylglyoxylic acid and ring-<sup>2</sup>H<sub>5</sub>-phenylglyoxylic acid.* To a 50 mL pear-shaped flask fitted with a stir bar were added 8 mL of xylenes, 1.45 mmol of isotopically-labeled phenylacetic acid, and 1.6 mmol of SeO<sub>2</sub>. The reaction was refluxed for 5 h at 155°C, cooled, and filtered to remove excess SeO<sub>2</sub>. The solvent was azeotroped with water (2:3 water/xylenes by weight) and evaporated in vacuo. The resulting mixture was dissolved in a small volume of MeOH, supplemented with 1.5 g of silica gel and dry-loaded onto a silica gel column (20g, d=1.25 cm, l=30 cm) that had been equilibrated in CH<sub>2</sub>Cl<sub>2</sub>/MeOH/formic acid (95:5:0.5). The column was resolved isocratically in the same solvent, in which phenylacetic acid and phenylglyoxylic acid had R<sub>f</sub> values of 0.4 and 0.12, respectively. This procedure afforded the corresponding product in a modest 10-20% yield. Despite the low yields, the procedure provided sufficient amounts of material to carry out the isotope feeding experiments. The isotopically-labeled precursors, 1,2-<sup>13</sup>C<sub>2</sub>-phenylacetic acid and ring-<sup>2</sup>H<sub>5</sub>-phenylacetic acid, were easily recovered during the work-up and purification in good yields. HPLC-MS analyses of the synthetic phenylglyoxylic acids and authentic, unlabeled phenylglyoxylic acid, as described above, confirmed the identity of the products. Authentic phenylglyoxylic acid: HPLC-MS R<sub>t</sub> = 8.2 min, λ<sub>max</sub> = 250 nm, 290 nm shoulder, LR-ESI-MS  $[M-H]^-_{\text{expt}} = 149.0$   $[M-H]^-_{\text{calc}} = 149.0$ . 1,2-<sup>13</sup>C<sub>2</sub>-phenylacetic acid: HPLC-MS R<sub>t</sub> = 8.1 min, λ<sub>max</sub> = 250 nm, 290 nm shoulder, LR-ESI-MS  $[M-H]^-_{\text{expt}} = 151.0$ ,  $[M-H]^-_{\text{calc}} = 151.0$ . Ring-<sup>2</sup>H<sub>5</sub>-phenylglyoxylic acid: HPLC-MS R<sub>t</sub> = 8.1 min, λ<sub>max</sub> = 250 nm, 290 nm shoulder, LR-ESI-MS  $[M-H]^-_{\text{expt}} = 154.0$ ,  $[M-H]^-_{\text{calc}} = 154.0$ ; HR-MS  $[M-H]^-_{\text{expt}} = 154.0559$ ,  $[M-H]^-_{\text{calc}} = 154.0553$ .

**Growth of *P. inhibens* DSM 17395 and purification of roseobactin.** *P. inhibens* DSM 17395 was used throughout this study. This is the same strain used in our previous reports.<sup>5,6</sup> Formerly known as *Phaeobacter gallaeciensis* (BS107), it was recently renamed to *P. inhibens* DSM 17395.<sup>7</sup>

*P. inhibens* DSM 17395 was routinely cultured in half-strength YTSS media (referred to as YTSS throughout) consisting of the following (per L): 20 g Sigma sea salt, 2 g yeast extract, and 1.25 g tryptone. To initiate production cultures, wild-type *P. inhibens* DSM 17395 on a YTSS agar plate (YTSS containing 1.6% w/v agar) was used to inoculate a 5 mL YTSS overnight

culture in a 14 mL bacterial culture tube. After ~15 h at 30°C and 250 rpm, the culture was diluted 50-fold into a 500 mL Erlenmeyer flask containing 50 mL of YTSS media. Overnight growth of this culture at 30°C and 160 rpm provided the inoculum for large-scale cultures. The 50 mL overnight culture was diluted 50-fold into 4-6 x 4 L flasks containing 400 mL of YTSS medium, 1 mM sinapic acid or 1 mM pCA (in the case of L-Tyr isotopomers), and any of the following isotopically-labeled compounds: 0.4 mM ring-<sup>2</sup>H<sub>5</sub>-L-Phe, 0.5 mM ring-<sup>2</sup>H<sub>5</sub>-L-Trp, 0.4 mM ring-<sup>2</sup>H<sub>4</sub>-L-Tyr, 0.4 mM 2-<sup>13</sup>C-L-Tyr, 0.4 mM 3-fluoro-DL-tyrosine, 0.4 mM 1,2-<sup>13</sup>C-phenylacetic acid, or 0.4 mM ring-<sup>2</sup>H<sub>5</sub>-phenylacetic acid. When assessing incorporation of pCA into roseobactin, 4-6 x 4 L Erlenmeyer flasks were used containing 400 mL YTSS and 1 mM ring-<sup>2</sup>H<sub>4</sub>-pCA or 1 mM 2-<sup>13</sup>C-pCA. The large-scale cultures were grown at 160 rpm and 30°C for 3 days. Roseobactin was isolated as previously described in detail.<sup>5</sup>

The fate of labeled phenylpyruvic acid, phenylglyoxylic acid, phenylglycine, and Cys were assessed by HPLC-MS from small production cultures. In this case, the 50 mL culture in a 500 mL Erlenmeyer flask contained 1 mM sinapic acid and 0.4 mM of either ring-<sup>2</sup>H<sub>5</sub>-phenylpyruvic acid, 1,2-<sup>13</sup>C-phenylglyoxylic acid, ring-<sup>2</sup>H<sub>5</sub>-phenylglyoxylic acid, ring-<sup>2</sup>H<sub>5</sub>-phenylglycine, or <sup>34</sup>S-L-Cys. After 3 days, each culture was extracted once with an equal volume of EtOAc. The organic layer was separated, dried over Na<sub>2</sub>SO<sub>4</sub>, and evaporated to dryness in a speedvac. The dried residue was typically dissolved in 1 mL of MeOH, filtered, and 10-30 µL were subsequently analyzed on an Agilent low-resolution HPLC-ESI-MS and/or an Agilent Accurate Mass Q-tof HPLC-MS system, as described above.

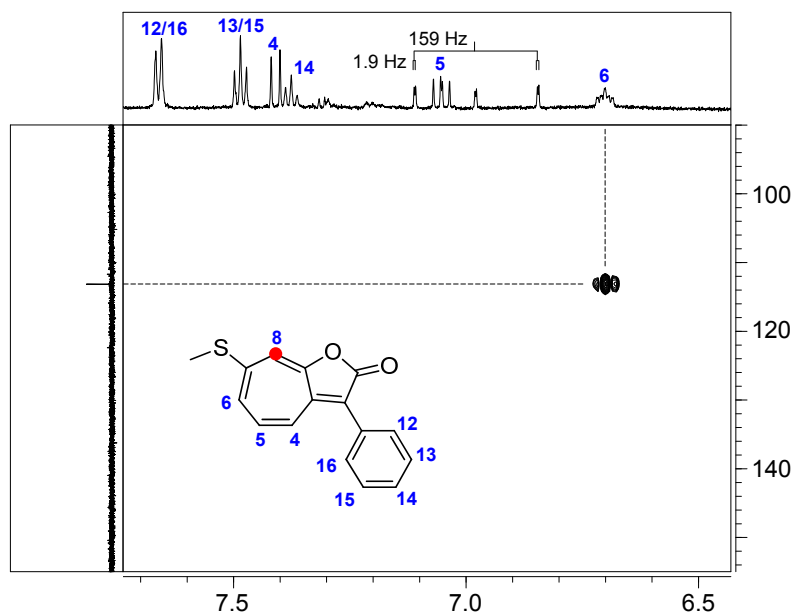

**Figure S1.** HMBC spectrum of roseobacticide B isolated from production cultures of *P. inhibens* DSM 17395 containing 0.4 mM 1,2- $^{13}\text{C}_2$ -phenylacetic acid and 1 mM sinapic acid. The  $^1\text{H}$ ,  $^{13}\text{C}$ , and HSQC spectra in Fig. 2 show that one  $^{13}\text{C}$  is incorporated at position 8. The HMBC spectrum above further corroborates this conclusion by demonstrating a strong correlation between H6 and C8. The structure and numbering of roseobacticide B with a single  $^{13}\text{C}$  at position 8 (red circle) is shown.

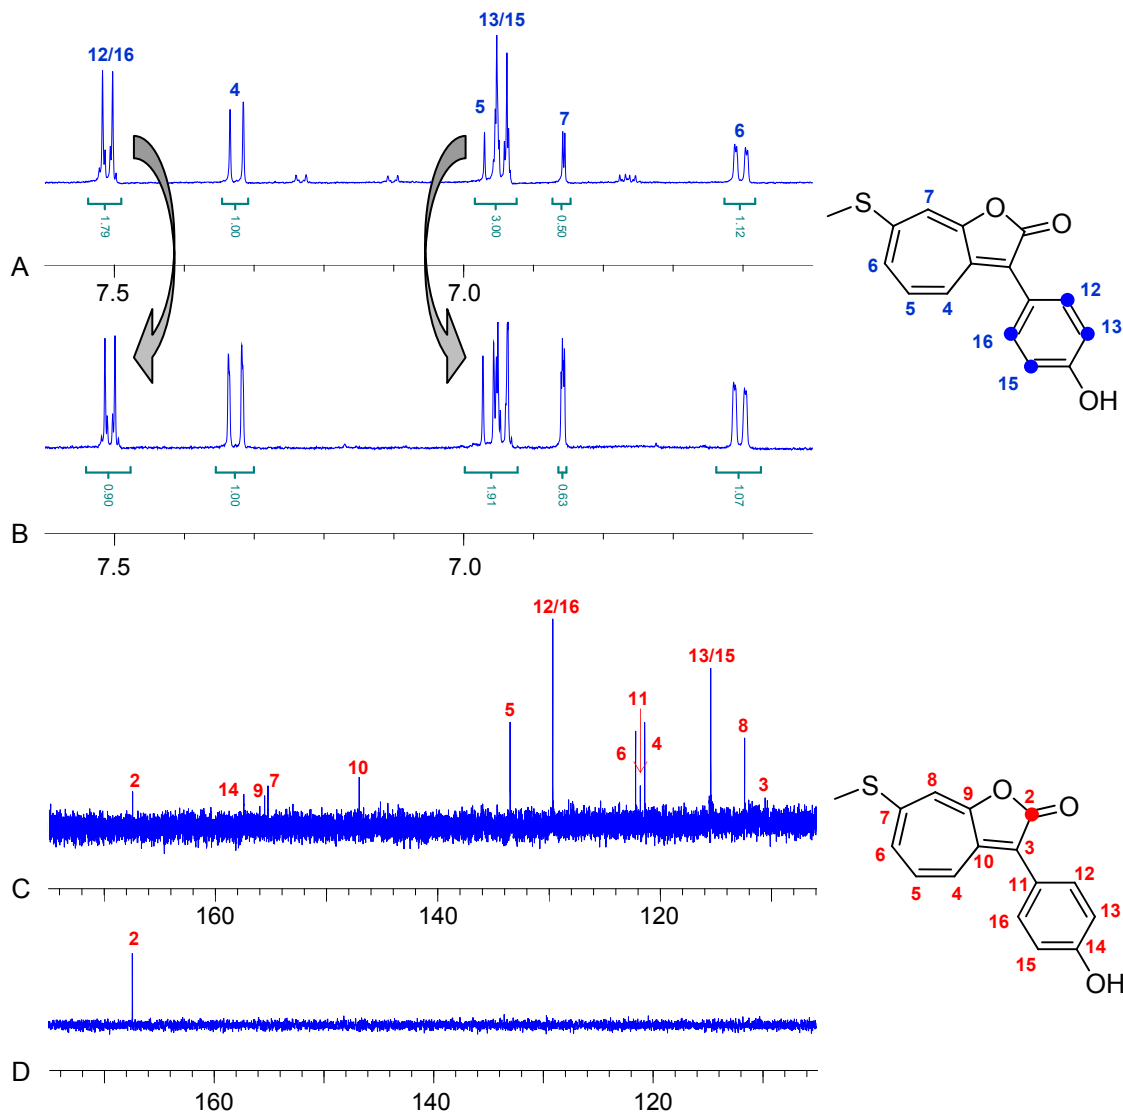

**Figure S2.**  $^1\text{H}$  and  $^{13}\text{C}$  spectra of roseobacticide A isolated from production cultures of *P. inhibens* DSM 17395 containing ring- $^2\text{H}_4$ -L-tyrosine/pCA and 2- $^{13}\text{C}$ -L-tyrosine/pCA, respectively. (A, B)  $^1\text{H}$  NMR spectrum of authentic roseobacticide A (A) and of roseobacticide A isolated from cultures containing ring- $^2\text{H}_4$ -L-tyrosine (B). The arrows indicate a reduction in the integral of the phenol aromatic peaks consistent with  $^2\text{H}$  incorporation. See also Table S1 for HR-ESI-MS data, which further corroborate this conclusion. The structure and numbering of ring- $^2\text{H}_4$ -roseobacticide A is shown. (C, D)  $^{13}\text{C}$  NMR spectrum of authentic roseobacticide A (C) and of roseobacticide A isolated from cultures containing 2- $^{13}\text{C}$ -L-tyrosine (D). Incorporation of  $^{13}\text{C}$  into the carbonyl C of roseobacticide A is observed. The structure and numbering of 2- $^{13}\text{C}$ -roseobacticide A is shown. See Table S1 for HR-MS data.

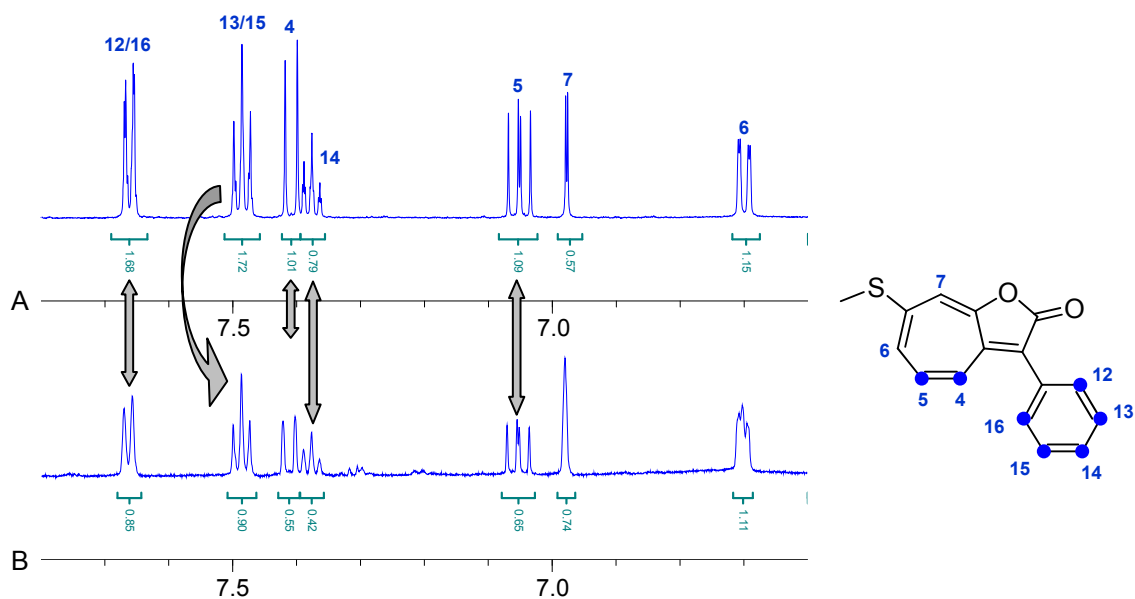

**Figure S3.**  $^1\text{H}$  NMR spectrum of roseobactin B isolated from production cultures of *P. inhibens* DSM 17395 containing ring- $^2\text{H}_5$ -L-phenylalanine and sinapic acid.  $^1\text{H}$  NMR spectrum of authentic roseobactin B (A) and of roseobactin B isolated from cultures containing ring- $^2\text{H}_5$ -L-phenylalanine/sinapic acid (B). The arrows indicate a reduction in the integral of the phenyl aromatic peaks and the protons at positions 4 and 5 consistent with  $^2\text{H}$  incorporation. The structure of the  $^2\text{H}_7$ -roseobactin B isotopomer is shown. See also Table S1 for HR-ESI-MS data.



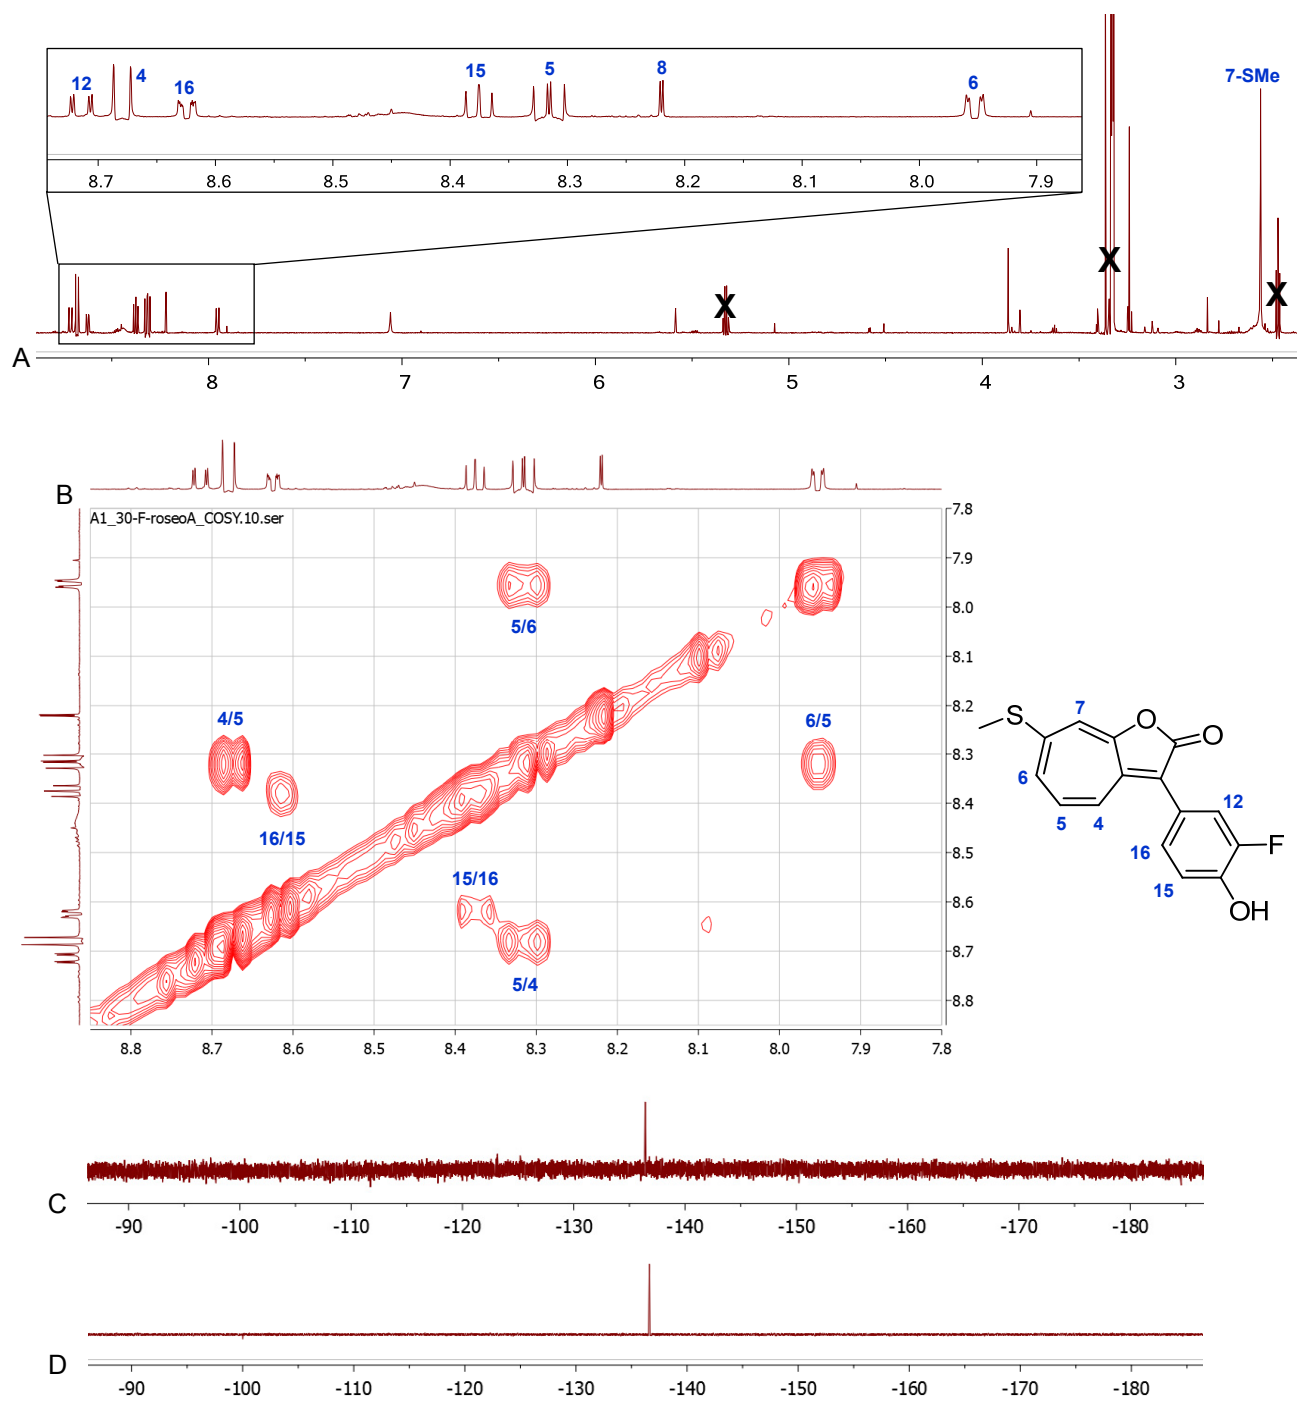

**Figure S4.** NMR characterization of 13-F-roseobacticide A. (A, B)  $^1\text{H}$  (A) and gCOSY (B) NMR spectra of pure 13-F-roseobacticide A generated by culturing *P. inhibens* DSM 17395 in the presence of 3-fluoro-DL-tyrosine and pCA. The inset in panel (A) shows an enlarged view of the downfield region of the  $^1\text{H}$  NMR spectrum. The observed peaks are assigned and the structure and numbering of 13-F-roseobacticide A is shown. (C, D)  $^{19}\text{F}$  NMR spectra of pure 13-F-roseobacticide A (C) and 3-fluoro-DL-tyrosine (D). Both spectra contain a single peak at  $-136$  ppm. See Table S1 for HR-MS data.

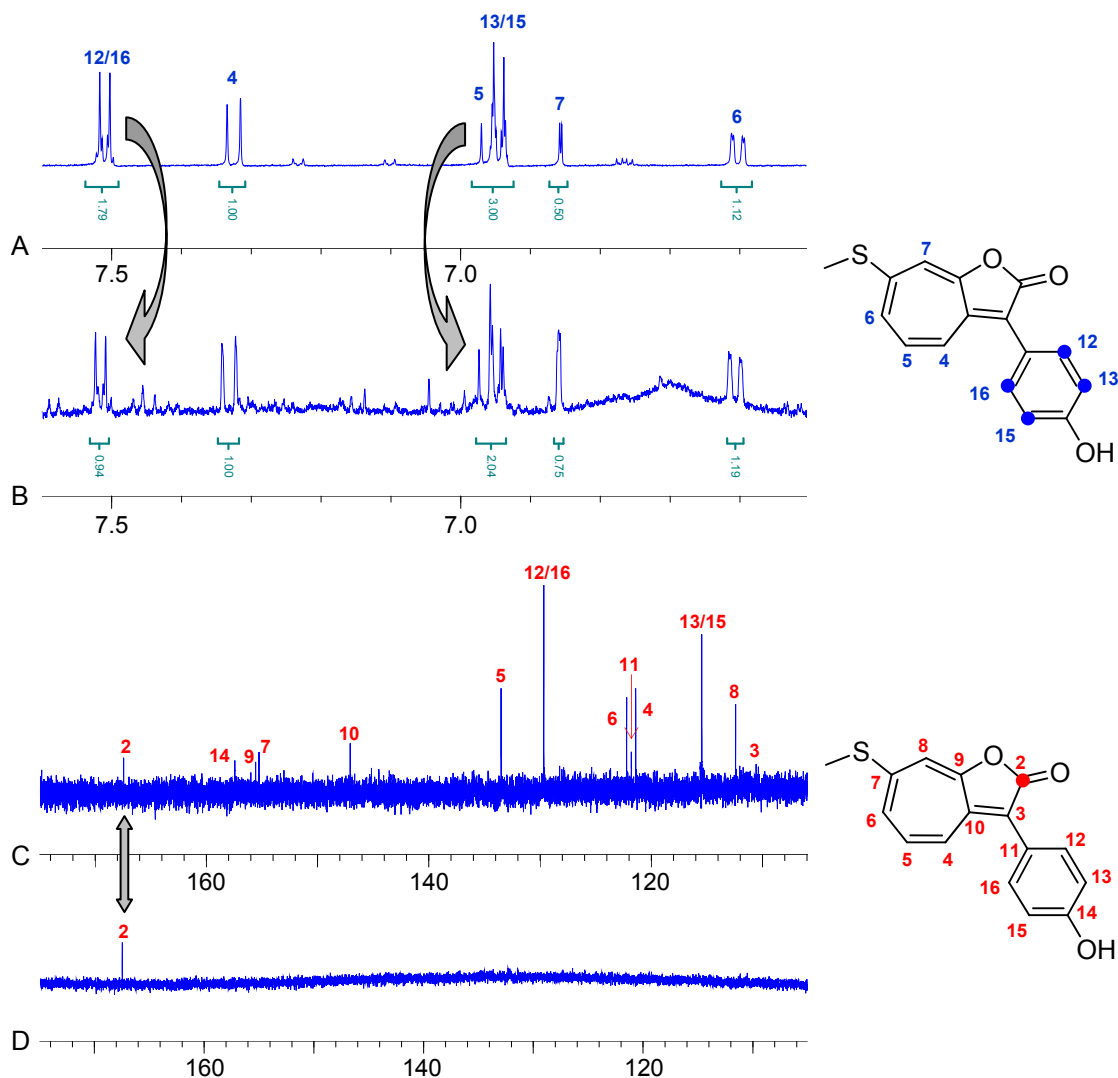

**Figure S5.**  $^1\text{H}$  and  $^{13}\text{C}$  spectra of roseobacticide A isolated from production cultures of *P. inhibens* DSM 17395 containing ring- $^2\text{H}_4$ -pCA or 2- $^{13}\text{C}$ -pCA, respectively. (A, B)  $^1\text{H}$  NMR spectrum of authentic roseobacticide A (A) and of roseobacticide A isolated from cultures containing ring- $^2\text{H}_4$ -pCA (B). The arrows indicate a reduction in the integral of the phenol aromatic peaks consistent with incorporation of  $^2\text{H}$  at these positions. See also Table S1 for HR-ESI-MS data, which further corroborate this conclusion. The structure and numbering of  $^2\text{H}_4$ -roseobacticide A is shown. (C, D)  $^{13}\text{C}$  NMR spectrum of authentic roseobacticide A (C) and of roseobacticide A isolated from cultures containing 2- $^{13}\text{C}$ -pCA (D). Incorporation of  $^{13}\text{C}$  into the carbonyl C of roseobacticide A is observed. The structure and numbering of 2- $^{13}\text{C}$ -roseobacticide A is shown. See Table S1 for HR-MS data.

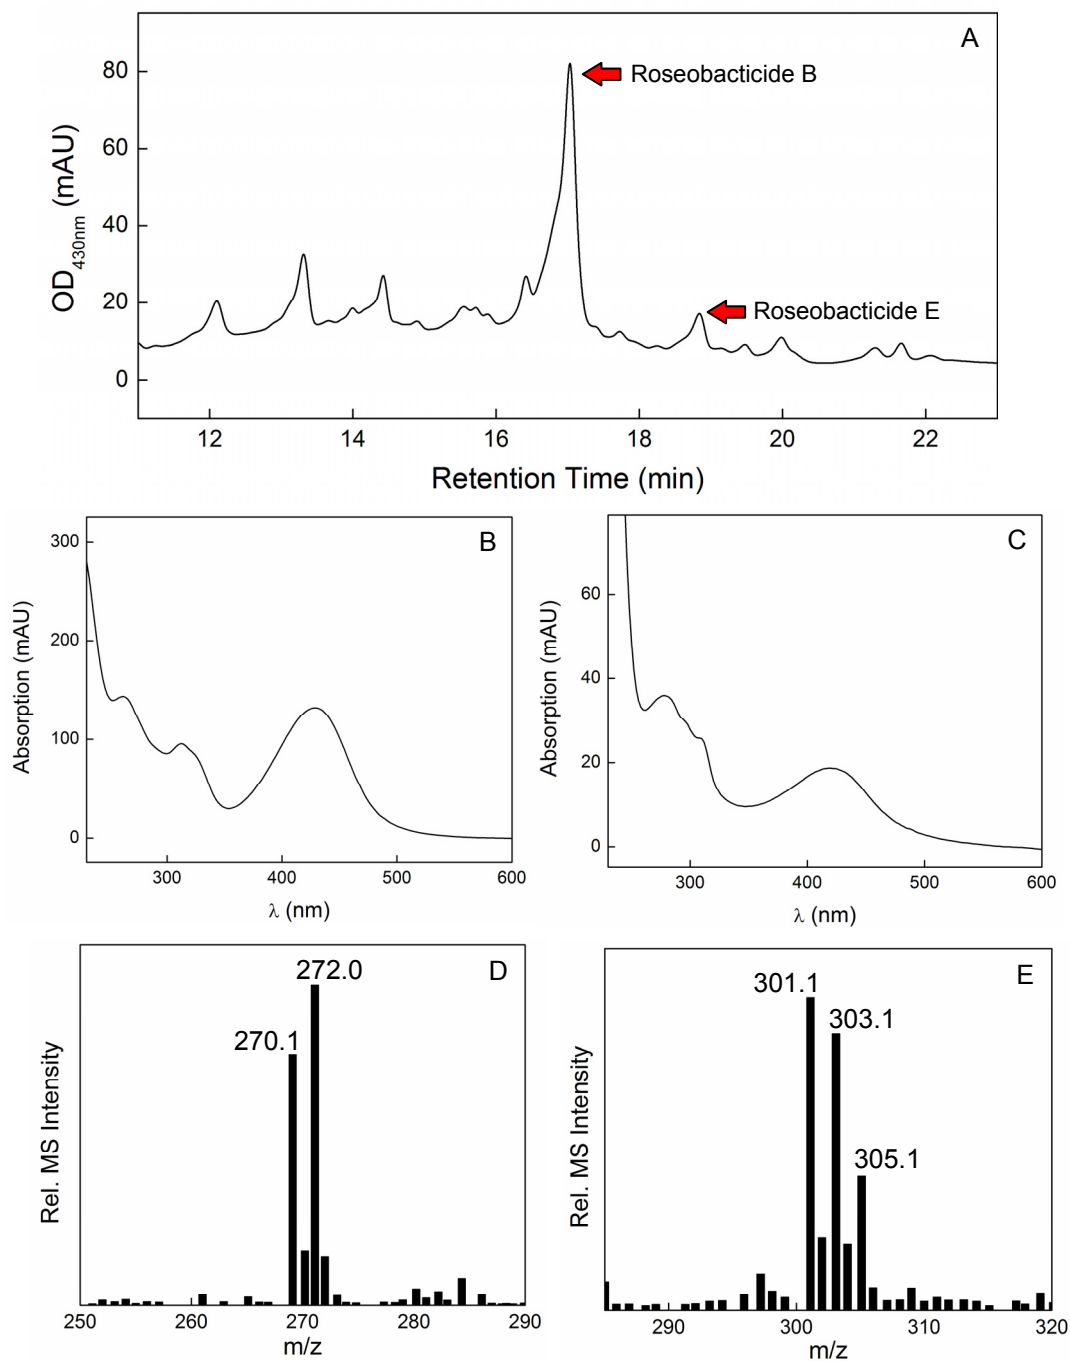

**Figure S6.** HPLC-ESI-MS analysis of  $^{34}\text{S}$ -roseobactin B and  $^{34}\text{S}_2$ -roseobactin E. (A) Analysis of *P. inhibens* DSM 17395 cultures grown in the presence of  $^{34}\text{S}$ -Cys and sinapic acid. The peaks corresponding to roseobactin B and E, as compared with standards, are marked. The UV-vis and mass spectra of these two peaks are displayed (B-E). The UV-vis spectra of roseobactin B (B) and roseobactin E (C) show the signature features typical for these two analogs. The mass spectrum of roseobactin B (D) shows both  $^{32}\text{S}$ - and  $^{34}\text{S}$ -bearing isotopomers. See Table S1 for HR-MS data. The mass spectrum of roseobactin E shows a mixture of  $^{32}\text{S}$ -,  $^{34}\text{S}$ -, and  $^{34}\text{S}_2$ -bearing roseobactin E isotopomers.

**Table S1. HR-ESI-MS data for roseobacticide isotopomers and analogs.**

| Experiment                                               | Roseobacticide isotopomer/analog | $[M+H]^+_{\text{calc}}$ | $[M+H]^+_{\text{expt}}$ | $\Delta\text{ppm}$ | Molecular Formula                                             |
|----------------------------------------------------------|----------------------------------|-------------------------|-------------------------|--------------------|---------------------------------------------------------------|
| 1,2- $^{13}\text{C}_2$ -phenylacetic acid, sinapic acid  | B                                | 270.0670                | 270.0673                | 1.1                | $\text{C}_{15}(^{13}\text{C})\text{H}_{13}\text{O}_2\text{S}$ |
| Ring- $^2\text{H}_5$ -phenylacetic acid, sinapic acid    | B                                | 271.0762                | 271.0745                | 2.5                | $\text{C}_{16}\text{H}_{11}(^2\text{H})_2\text{O}_2\text{S}$  |
| Ring- $^2\text{H}_5$ -indoleacetic acid                  | C                                | 308.0745                | 308.0747                | 0.7                | $\text{C}_{18}\text{H}_{14}\text{NO}_2\text{S}$               |
| Ring- $^2\text{H}_5$ -L-tryptophan, sinapic acid         | C                                | 313.1059                | 313.1063                | 1.3                | $\text{C}_{18}\text{H}_9(^2\text{H})_5\text{NO}_2\text{S}$    |
| Ring- $^2\text{H}_4$ -L-tyrosine, pCA                    | A                                | 289.0836                | 289.0838                | 0.7                | $\text{C}_{16}\text{H}_9(^2\text{H})_4\text{O}_3\text{S}$     |
| 2- $^{13}\text{C}$ -L-tyrosine, pCA                      | A                                | 286.0619                | 286.0620                | 0.3                | $\text{C}_{15}(^{13}\text{C})\text{H}_{13}\text{O}_3\text{S}$ |
| Ring- $^2\text{H}_5$ -L-phenylalanine, sinapic acid      | B                                | 271.0762                | 271.0764                | 0.7                | $\text{C}_{16}\text{H}_{11}(^2\text{H})_2\text{O}_2\text{S}$  |
|                                                          |                                  | 274.0950                | 274.0953                | 1.1                | $\text{C}_{16}\text{H}_8(^2\text{H})_5\text{O}_2\text{S}$     |
|                                                          |                                  | 276.1076                | 276.1078                | 0.7                | $\text{C}_{16}\text{H}_6(^2\text{H})_7\text{O}_2\text{S}$     |
| Ring- $^2\text{H}_4$ -pCA                                | A                                | 289.0836                | 289.0841                | 1.7                | $\text{C}_{16}\text{H}_9(^2\text{H})_4\text{O}_3\text{S}$     |
| Ring- $^2\text{H}_4$ -pCA                                | D                                | 321.0557                | 321.0557                | 0.0                | $\text{C}_{16}\text{H}_9(^2\text{H})_4\text{O}_3\text{S}_2$   |
| 2- $^{13}\text{C}$ -pCA                                  | A                                | 286.0619                | 286.0623                | 1.4                | $\text{C}_{15}(^{13}\text{C})\text{H}_{13}\text{O}_3\text{S}$ |
| 3-F-DL-tyrosine, pCA                                     | A                                | 303.0491                | 303.0490                | 0.3                | $\text{C}_{16}\text{H}_{12}\text{FO}_3\text{S}$               |
| 3-F-DL-tyrosine, pCA                                     | D                                | 335.0212                | 335.0207                | 1.5                | $\text{C}_{16}\text{H}_{12}\text{FO}_3\text{S}_2$             |
| Ring- $^2\text{H}_5$ -phenylpyruvic acid, sinapic acid   | B                                | 274.0950                | 274.0954                | 1.5                | $\text{C}_{16}\text{H}_8(^2\text{H})_5\text{O}_2\text{S}$     |
| Ring- $^2\text{H}_5$ -phenylglyoxylic acid, sinapic acid | B                                | 269.0636                | 269.0638                | 0.7                | $\text{C}_{16}\text{H}_{13}\text{O}_2\text{S}$                |
| Ring- $^2\text{H}_5$ -phenylglycine, sinapic acid        | B                                | 269.0636                | 269.0639                | 1.1                | $\text{C}_{16}\text{H}_{13}\text{O}_2\text{S}$                |
| $^{34}\text{S}$ -L-Cysteine                              | B                                | 271.0594                | 271.0592                | 0.7                | $\text{C}_{16}\text{H}_{13}\text{O}_2(^{34}\text{S})$         |

**Table S2. NMR data for 13-F-roseobacticide A.**

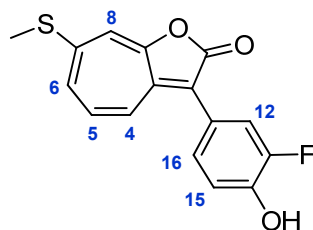

| C/H   | $\delta_H$ | Integral, multiplicity (Hz) | $\delta_F$ | COSY            |
|-------|------------|-----------------------------|------------|-----------------|
| 4     | 8.68       | 1H, d (11.7)                |            | H5              |
| 5     | 8.31       | 1H, dd (9.5, 11.7)          |            | H4, H6          |
| 6     | 7.95       | 1H, dd (1.9, 9.5)           |            | H5, H8 (weak)   |
| 7-SMe | 2.55       | 3H, s                       |            |                 |
| 8     | 8.22       | 1H, d (1.9)                 |            | H6 (weak)       |
| 12    | 8.71       | 1H, dd (2.1, 12.4)          |            | F13, H16 (weak) |
| 13    |            | 1F, s*                      | -136.4     | H12, H15        |
| 15    | 8.38       | 1H, dd (8.5, 9.3)           |            | H16, F13        |
| 16    | 8.68       | 1H, ddd (1.0, 2.1, 8.5)     |            | H12, H15        |

\*<sup>19</sup>F NMR spectrum collected in <sup>1</sup>H-decoupled mode

## Supporting Information References

- 1- Brock, N. L.; Nikolay, A.; Dickschat, J. S. *Chem. Commun.* **2014**, 50, 5487.
- 2- Robbins, R. J.; Schmidt, W. F. *J. Label. Compd. Radiopharm.* **2004**, 47, 797.
- 3- Skowera, K.; Kanska, M. *J. Label. Compd. Radiopharm.* **2008**, 51, 321.
- 4- Murata, S.; Sugiyama, K.; Tomioka, J. *J. Org. Chem.* **1993**, 58, 1976.
- 5- Seyedsayamdost, M. R.; Carr, G.; Kolter, R.; Clardy, J. *J. Am. Chem. Soc.* **2011**, 133, 18343.
- 6- Seyedsayamdost, M. R.; Case, R. J.; Kolter, R.; Clardy, J. *Nat. Chem.* **2011**, 3, 331.
- 7- Buddruhs, N.; Pradella, S.; Göker, M.; Päuker, O.; Pukall, R.; Spröer, C.; Schumann, P.; Peterson, J.; Brinkhoff, T. *Int. J. Syst. Evol. Microbiol.* **2013**, 63, 4340.

*Complete citation for references (9) and (16) in the paper:*

(9) Holligan, P. M.; Fernandez, E.; Aiken, J.; Balch, W. M.; Boyd, P.; Burkill, P. H.; Finch, M.; Groom, S. B.; Malin, G.; Muller, K.; Purdie, D. A.; Robinson, C.; Trees, C. C.; Turner, S. M.; van der Wal, P. *Global Biogeochem. Cycles* **1993**, 7, 879.

(16) Wagner-Döbler, I.; Ballhausen, B.; Berger, M.; Brinkhoff, T.; Buchholz, I.; Bunk, B.; Cypionka, H.; Daniel, R.; Drepper, T.; Gerdts, G.; Hahnke, S.; Han, C.; Jahn, D.; Kalhoefer, D.; Kiss, H.; Klenk, H. P.; Kyrpides, N.; Liebl, W.; Liesegang, H.; Meincke, L.; Pati, A.; Petersen, J.; Piekarski, T.; Pommerenke, C.; Pradella, S.; Pukall, R.; Rabus, R.; Stackebrandt, E.; Thole, S.; Thompson, L.; Tielen, P.; Tomasch, J.; von Jan, M.; Wanphrut, N.; Wichels, A.; Zech, H.; Simon, M. *ISME J.* **2010**, 4, 61.
